# Supplementary material for: New insights into molecular pathways associated with flatfish ovarian development and atresia revealed by transcriptional analysis
Source: PubMed Central journal article supplement (PMC2751788; doi:10.1186/1471-2164-10-434), 2009-09-15

# A

pfam04691: ApoC-1 apdlsstlesipDKLKEFGntLEDKAr+riKqsel+aK+R+WFsEaFkKvkeklKttf

```

Cons          +pd+ss+l   DKLKEFGntLEDKAr+riKqsel+aK+R+WFsEaFkKvkeklK+++
Human         1  MRLFLSLPVLVVVLSIVLEGPAPAQG---TPDVSSAL----DKLKEFGntLEDKARELISRIKQSELSAKMREWFSETFQKVKEKLIKIDS 83
Cons          p l + + ++KE   L DK + a ++i qsel +KtRnWF + ++K k+k+ tf
Zebrafish    38  MKLYLAAAVLMLVLAVHTEA----QE-EPTLEQHFTKFGTQMKEIAEDLADKTKTAFQNI EQSELGKTKRnWFNDQYELKQKMTETF 121
Cons          + + + D++ E   L +KA+a +++ + se ++K +nW +E + vk+ +
Sole         1  MRLYLAVAVLMLAFVAYTEA----Q--DDTIEERFSAFTDRVAEMSRNLAEKAKANMQEFQSSEFATKAKNwITERVEAVKNSFN--- 79
Cons          + + + +++   G L +KA+ a ++i se +KtR+WF+E + k k++ +
Sea bream   1  MRLFLAVAVLMLAFIAYTEA----Q--EETMEQKFTQFGERVTQVGQDLAEKAKTAFDSIHNSEAMTKTRDWFAEQLEALKAKVQEIS 83
Cons          + + ++K+   L K ++++e+i se +KtR WF+E F+K+k k+ tf
Trout       1  MKLSIAIAVLMLVFAAHTA----QEAEKTIIEHF TTFGNQMKDLSedLTVKTKDIVEKIGDSEFITKTRTWFTeQFDKMKAKIDETF 87
          *   **   *
  
```

# B

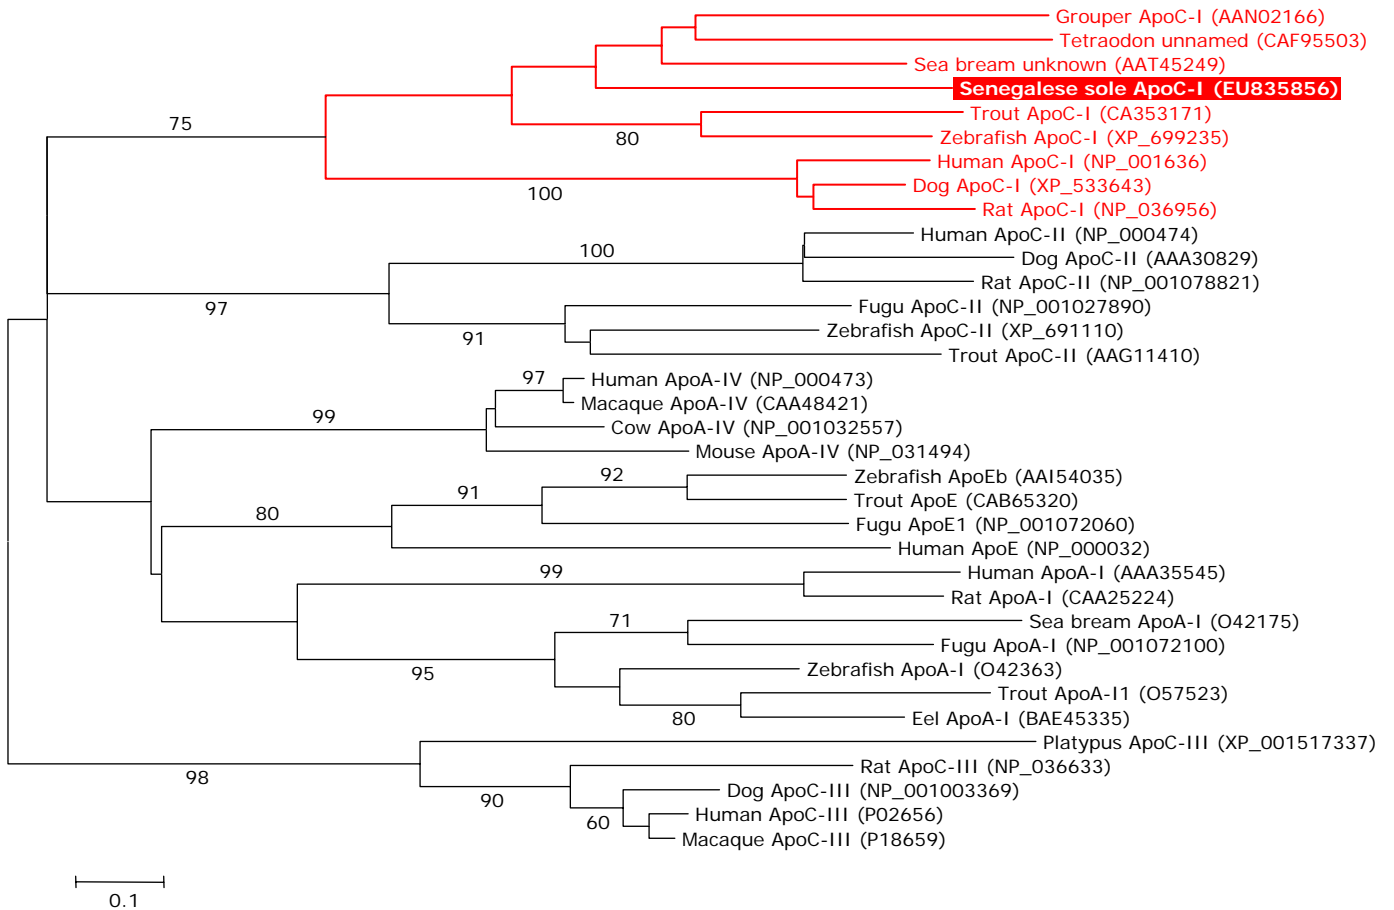

Supplement: 1471-2164-10-434-S2.pdf [file 1471-2164-10-434-S2.pdf]
