# Supplementary material for: New insights into molecular pathways associated with flatfish ovarian development and atresia revealed by transcriptional analysis
Source: PubMed Central journal article supplement (PMC2751788; doi:10.1186/1471-2164-10-434), 2009-09-15

**A**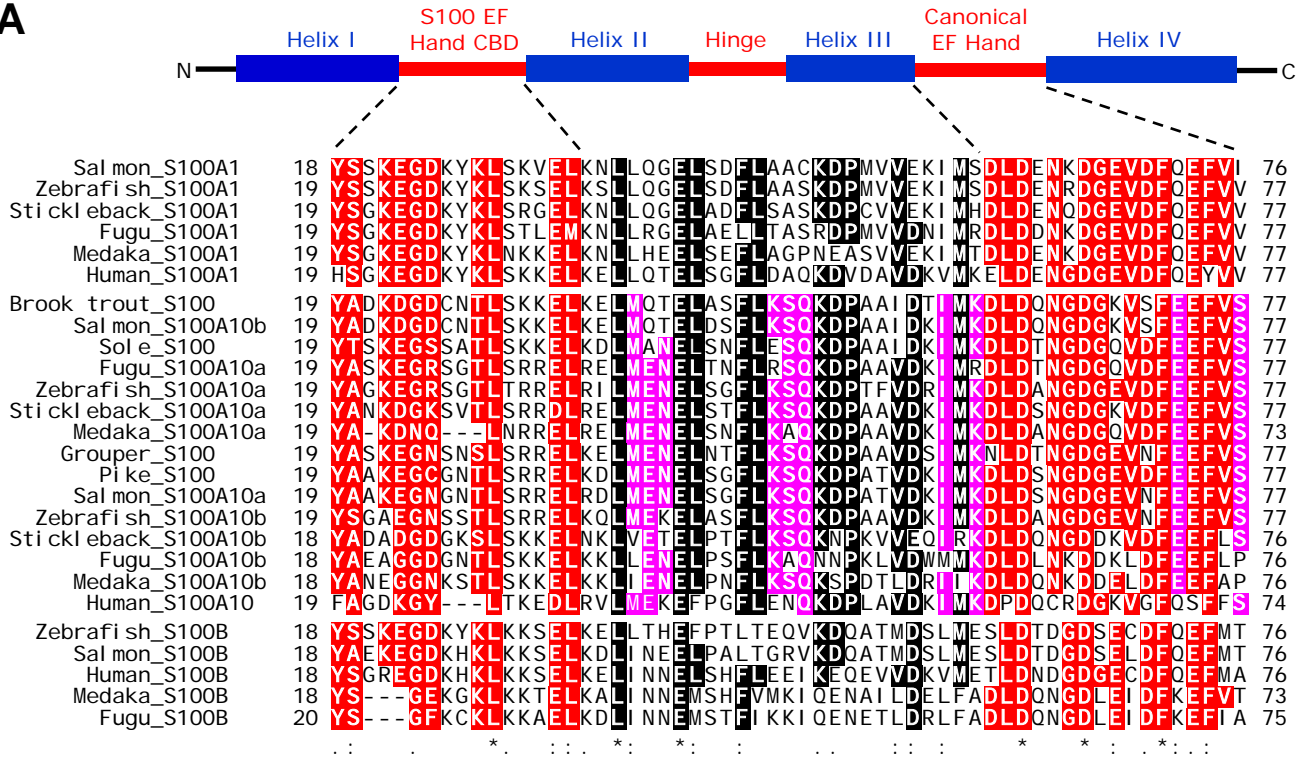**B**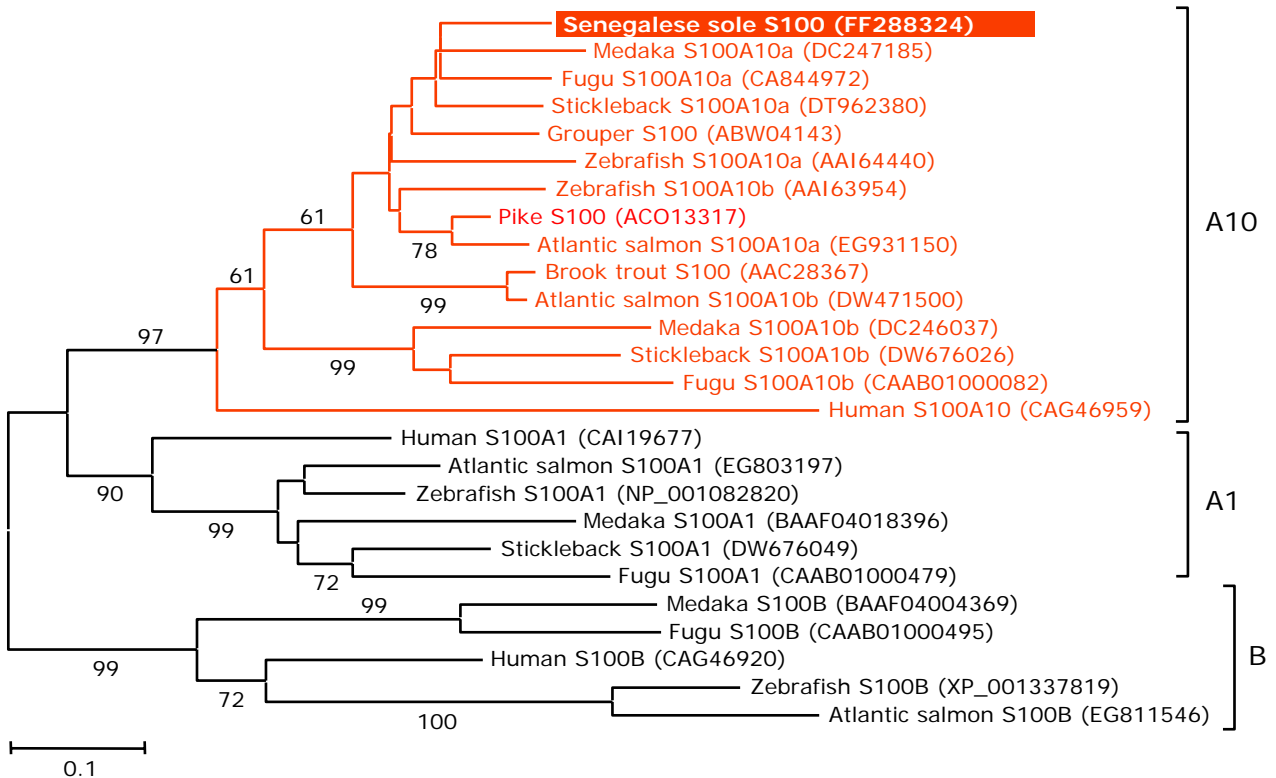

Supplement: 1471-2164-10-434-S3.pdf [file 1471-2164-10-434-S3.pdf]
