# Supplementary material for: New insights into molecular pathways associated with flatfish ovarian development and atresia revealed by transcriptional analysis
Source: PubMed Central journal article supplement (PMC2751788; doi:10.1186/1471-2164-10-434), 2009-09-15
Supplement: 1471-2164-10-434-S4.pdf [file 1471-2164-10-434-S4.pdf]

## Nucleotide sequences of the primers employed for real-time qPCR

| Clone ID    | GenBank accession | Transcript symbol        | Forward sequence         | Reverse sequence          |
|-------------|-------------------|--------------------------|--------------------------|---------------------------|
| pgsP0002C23 | FF282126          | <i>cyfip1</i>            | TGCAGGTGTTGATGGGTCGT     | GCAGAGCTGGGTCGTTGTGA      |
| pgsP0006E10 | FF283378          | <i>ctbp1</i>             | ACAAAACCGCGAGTGACATC     | GCCACAGAGGGTGGCTAAAC      |
| pgsP0007K07 | FF283810          | <i>lect2l</i>            | CTGCAGTGGAAACCCAAACA     | GTCACGTCAAACGGAGCGTA      |
| pgsP0008C17 | FF283994          | <i>apoa1</i>             | TTGAGGCTAATCGTGCCAAA     | CCTGCGTGCTTGTCCCTGTA      |
| pgsP0010O12 | FF284909          | <i>thbs1</i>             | CGCGTCTCTTCTCAGACCT      | GCGTCTGGTGCATCTCAGTT      |
| pgsP0012B12 | FF285326          | <i>BRAFLDRAFT_128798</i> | GAGTTTCTGCGCAAATGCAG     | GTGACACAGCGGGTGATCTT      |
| pgsP0013B15 | FF285673          | <i>tob1a</i>             | GCCCCCTGCAGTACAACAAT     | TTTGCATGTACTAGTTGGCCATAA  |
| pgsP0013L08 | FF285880          | <i>si:ch211-81a5.7</i>   | TGGTGCAGGGCTCTCGTGTA     | CTTGTGGCTGCAGAGGTGGA      |
| pgsP0015C05 | FF286365          | <i>apoc1</i>             | CGTGCTGATGCTGGCTTTTG     | TTGCAAACCTCGTGCTCTGG      |
| pgsP0015N21 | FF286629          | <i>sepw2a</i>            | GGCCAGTGCTACTGTAAAATGC   | GAAAGCAGCGAGCTGTTAGG      |
| pgsP0016M08 | FF286940          | <i>atp1b1a</i>           | CACCGTTACTTTGCCGTTCA     | CTAGGCTGGACCCACAAAGC      |
| pgsP0017B15 | FF287055          | <i>a2m</i>               | AGGACATTCCCATCCACCAC     | AGCCTTGTCACTTGGCTGGT      |
| pgsP0019B22 | FF287743          | <i>hsp90b</i>            | TGGACCAGAAACCCTGATGA     | CAGCTGACCCTCCACTGAGA      |
| pgsP0020D03 | FF288118          | <i>zp3</i>               | TCCATGCTCCCCTTCGTGTT     | CTTGAAAGCGGCCCATGAAC      |
| pgsP0020M08 | FF288324          | <i>s100a10</i>           | TGCCATGGAGTCCCTTATCA     | TCGATAGCAGCAGGGTCCTT      |
| pgsP0022B24 | FF288799          | <i>mkrn1</i>             | AGCCCTGCCCTCTCCTAC       | GCACTGCCACAATACGAAGG      |
| pgsP0022J20 | FF288970          | <i>mapk13</i>            | ACGGGTATCGACCTGCTGGA     | GTGGCGTTGTCATGGCTGTC      |
| pgsP0023H12 | FF289266          | <i>LOC100005008</i>      | TGGTTGTTGCTGTGGGAGGA     | GACACGCTCCTGTCCCTGGT      |
| pgsP0025P21 | FF290169          | <i>LOC100090881</i>      | TGCAACCAATGCTGTTAGGG     | ATCCTCAGCTCGCAACACCT      |
| pgsP0027C08 | FF290565          | <i>acaa2</i>             | GAGGCGTTTGCCCTCAGTA      | GCTCCAGAAGCAGCGAGAGG      |
|             | EF126042          | <i>18s</i>               | GAATTGACGGAAGGGCACCACCAG | ACTAAGAACGGCCATGCACCACCAC |
